# Supplementary material for: Characterisation of LTR-Retrotransposons of Stevia rebaudiana and Their Use for the Analysis of Genetic Variability
Source: MDPI journal article supplement (doi:10.3390/ijms23116220), 2022-06-01
Supplement: s1 [file s1]

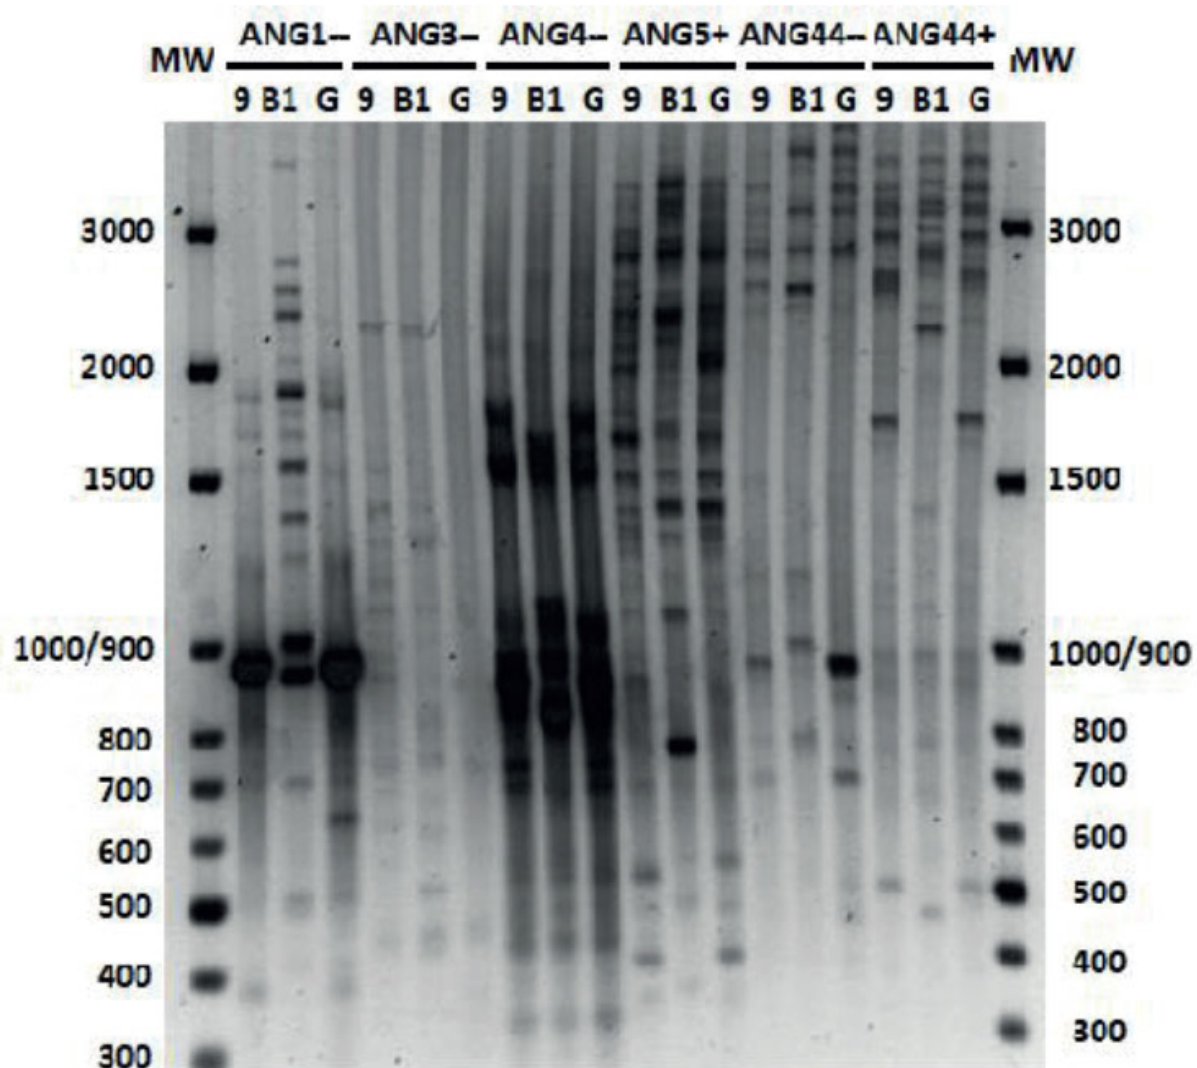

**Figure S1.** IRAP fingerprints obtained with 6 primers (ANG1– to ANG44+) targeting LTR-REs belonging to the *Copia/Angela* lineage in 3 accessions of *S. rebaudiana*. Accession codes are listed in Table 2. A molecular weight marker (MW, 100 bp DNA Ladder (Solis Biodyne)) was loaded.
