# Supplementary material for: Characterisation of LTR-Retrotransposons of Stevia rebaudiana and Their Use for the Analysis of Genetic Variability
Source: MDPI journal article supplement (doi:10.3390/ijms23116220), 2022-06-01
Supplement: s1 [file s1]

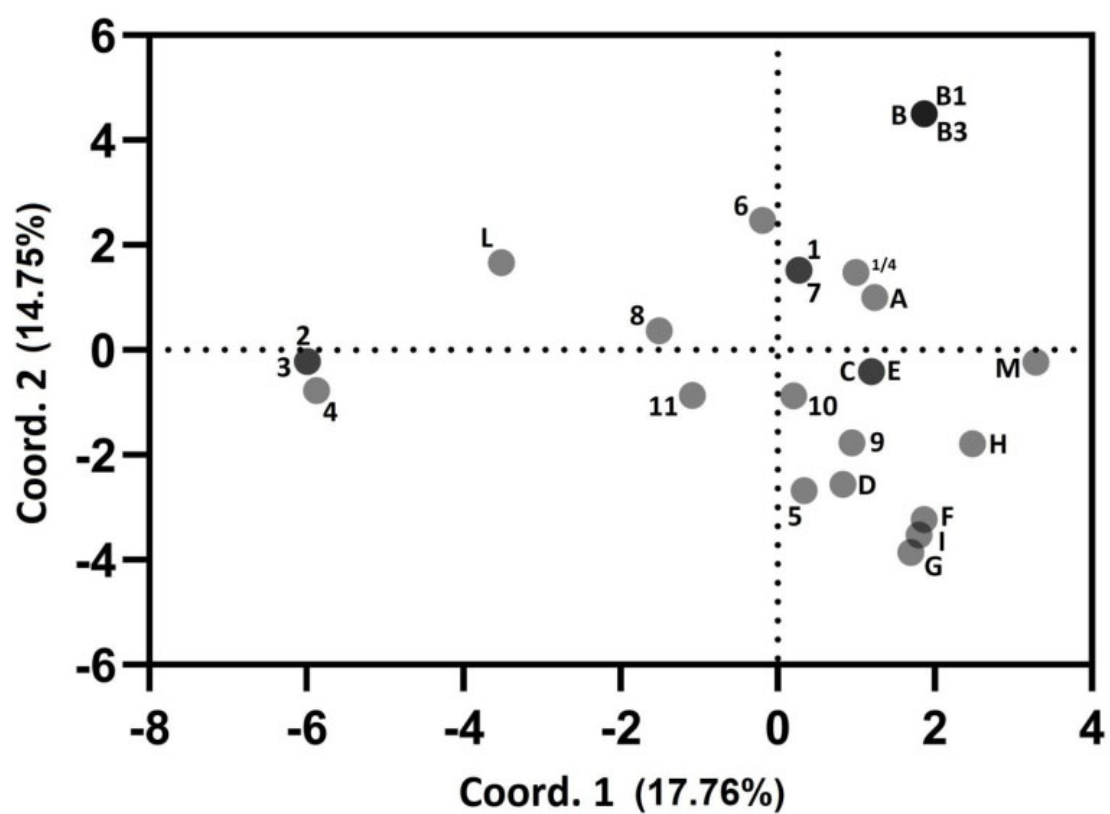

**Figure S2.** PCA plot based on IRAP matrix of 25 accessions of *Stevia rebaudiana*. Accession codes according to Table 3. Grey dots indicate single accessions, black dots indicate an identical position of more than one accession.
